# Supplementary material
Source: Research Square preprint supplement (doi:10.21203/rs.3.rs-8783178/v1)
Supplement: Supplementary file 1 [file 2994be2f802b0d8983336c67.docx]

**Supplementary file-1:**

Tool 1:Self-structured Questionnaire for Socio-Demographic Variables

Socio-Demographic Proforma

Please give an appropriate answer to the corresponding option. The information will be kept confidential

1. Age in year_________________

2. Gender

a) Male

b) Female

c) Other

3. Marital status

a) Married

b) Unmarried

c) Widow/ widower

d) Divorcee / Separated

4. Level educational Status

a) No formal education

b) Primary level

c) Secondary level

d) Higher secondary or above

5. Duration of current job in year__________

6. Total hour of work per day

a) 6

b) 8

c) 10-12

7. Types of family

a) Nuclear

b) Joint

c) Extended

8. No of family member ______________

9. Total no of dependant at home

a) 2-4

b) 5-6

c) 7-8

d) 9-10

10. Salary per month in rupees ________________

11. Total percapita monthly income

a) 2,000-5,000

b) 5,001-10,000

c) More than 10,000

**TOOL -2: Standardized Perceived Stress Scale on Level of Stress Performa**

**INSTRUCTION: -For each statement, please give an appropriate response of the corresponding option to indicate your degree of freedom.**

**[Score 0= Never 1=Almost never 2= Sometimes 3= fairly often 4= Very often]**

| **SL**  **No** | **Questions** | **Score** | | | | | |
| --- | --- | --- | --- | --- | --- | --- | --- |
| **Never** | **Almost**  **Never** | | **Sometime** | **Fairly**  **Often** | **Very**  **Often** |
| 1 | In the last month, how often have you been upset because of something that happened unexpectedly? |  |  |  | |  |  |
| 2 | In the last month, how often have you felt that you were unable to control the important things in your life? |  |  |  | |  |  |
| 3 | In the last month, how often have you felt nervous and "stressed"? |  |  |  | |  |  |
| 4 | In the last month, how often have you felt confident about your ability to handle your personal problems? |  |  |  | |  |  |
| 5 | In the last month, how often have you felt that things were going your way? |  |  |  | |  |  |
| 6 | In the last month, how often have you found that you could not cope with all the things that you had to do? |  |  |  | |  |  |
| 7 | In the last month, how often have you been able to control irritations in your life? |  |  |  | |  |  |
| 8 | In the last month, how often have you felt that were on top of things? |  |  |  | |  |  |
| 9 | In the last month, how often have you been angered because of things that were outside of your control? |  |  |  | |  |  |
| 10 | In the last month, how often have you felt difficulties were piling up so high that you could not overcome them? |  |  |  | |  |  |

**Tool-3: Nutritional Status**

Weight and height measurement by using a weight machine and a measuring tape

Weight_____________

Height_____________

NCHS “WHO” standard Scale used for BMI status

BMI_______________
